# Supplementary material for: How to describe species richness patterns for bryophyte conservation?
Source: PubMed Central journal article supplement (PMC4813098; doi:10.1002/ece3.1796), 2015-10-28
Supplement: ECE3-5-5443-s001.pdf [file ECE3-5-5443-s001.pdf]

This file is an ASCII-formatted text file in ESRI ASCII raster format and has the information of soil acidity/alkalinity (categorical variable: 0 – acid; 1-basic) for the Iberian Peninsula that was derived from the European Soil Database v2.0 ([http://eusoils.jrc.ec.europa.eu/ESDB\\_Archive/ESDB\\_data\\_1k\\_raster\\_intro/ESDB\\_1k\\_raster\\_data\\_intro.html](http://eusoils.jrc.ec.europa.eu/ESDB_Archive/ESDB_data_1k_raster_intro/ESDB_1k_raster_data_intro.html)).
